# Supplementary material for: Focal DEPDC5 loss without disruption to cerebral cortical neuron migration recapitulates DEPDC5-related focal epilepsy
Source: JCI journal article supplement (doi:10.1172/jci.insight.181544), 2025-09-25
Supplement: sd2 [file 2]

P0 P5 P10 P21 8wk P0 P5 P10 P21 8wk P0 P5 P10 P21 8wk

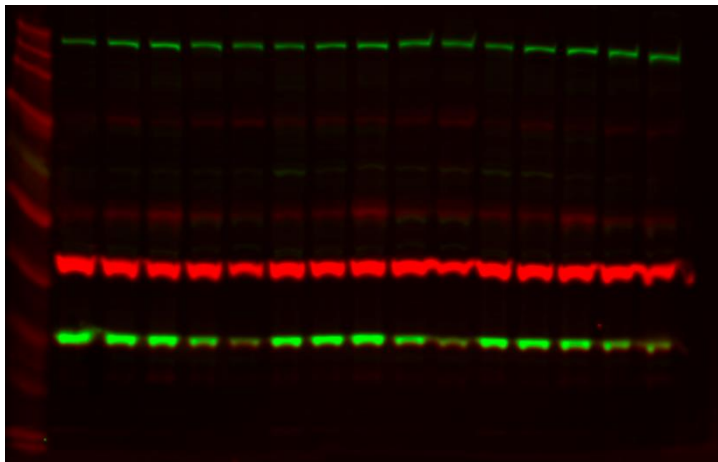

Depdc5

Actin

pS6/S6

Channel 1 (800 nm)  
Depdc5, pS6

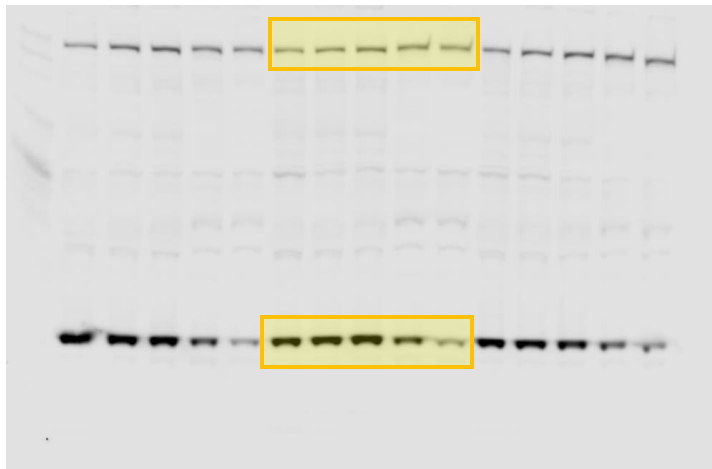

Channel 2 (680 nm)  
Actin, S6

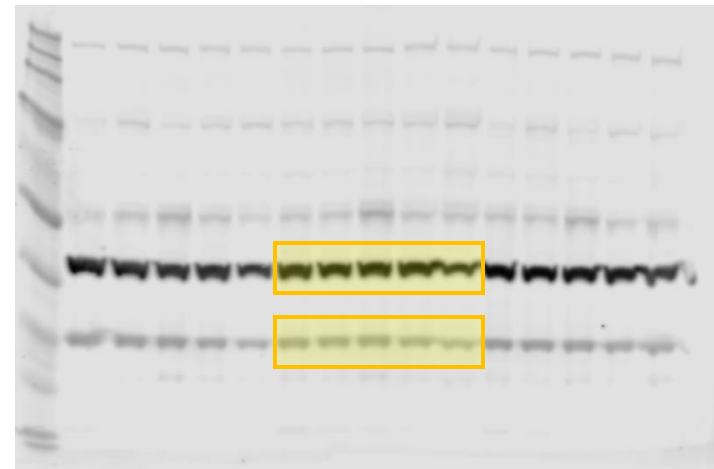

Channel 1 (800 nm)  
mTOR

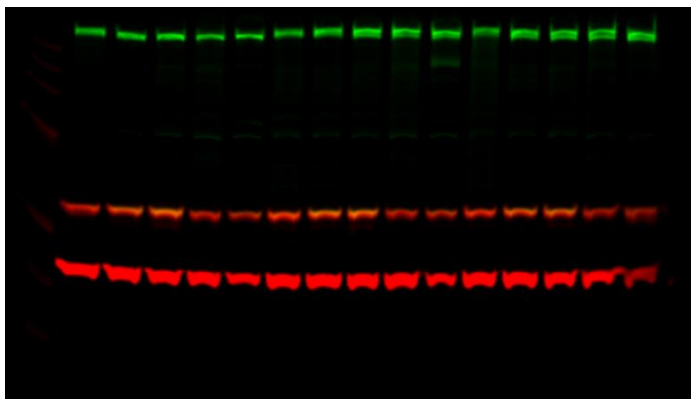

mTOR

pAKT/AKT

Actin

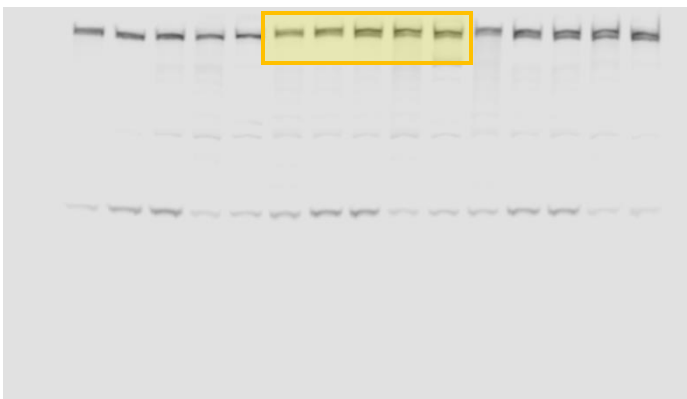

Channel 2 (680 nm)

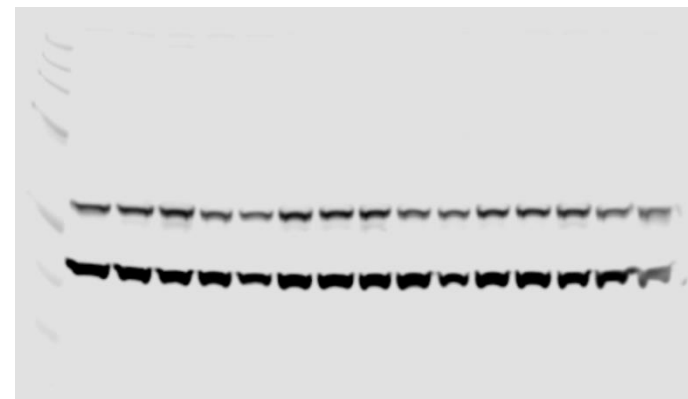

Full unedited gel for Figure 1A

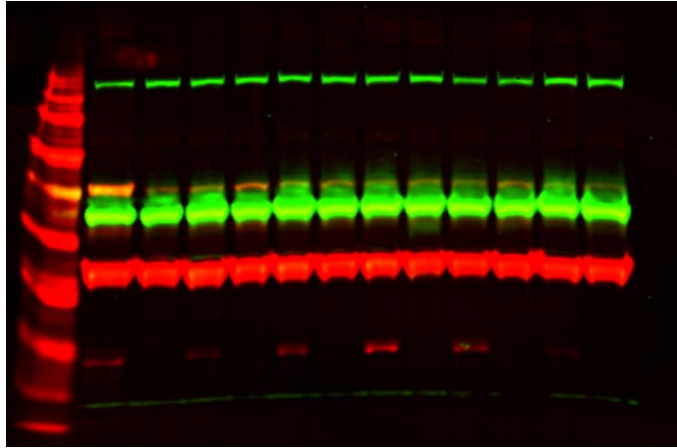

Depdc5

Actin

GFP

Channel 2 (680 nm) – higher brightness  
GFP

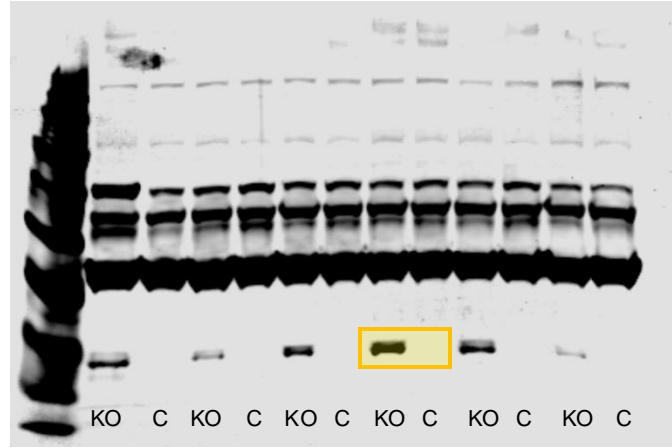

Channel 2 (680 nm) – lower brightness  
Actin

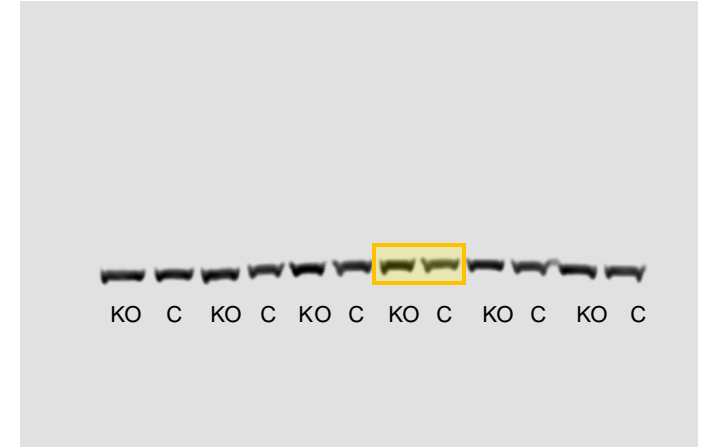

Channel 1 (800 nm)  
Depdc5

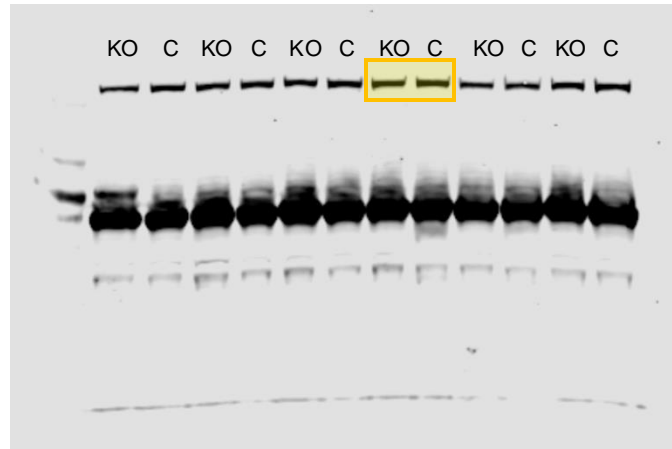

KO = *Depdc5* KO  
C = control

Full unedited gel for Figure 2A

GFP

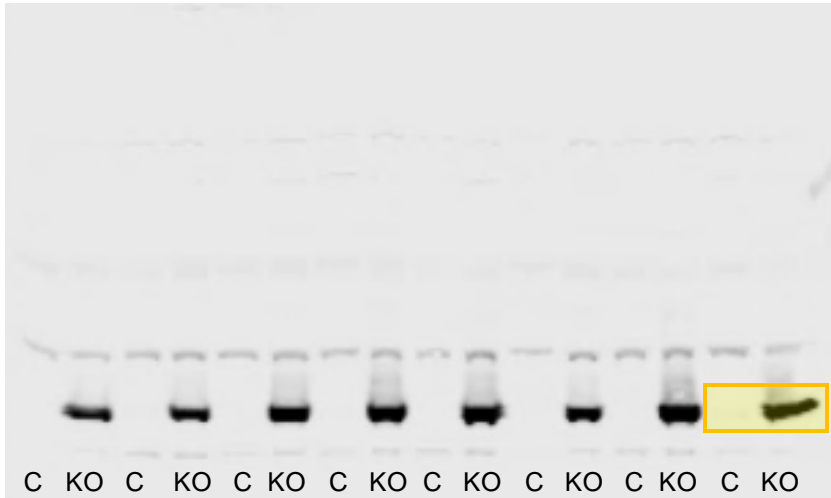

Depdc5

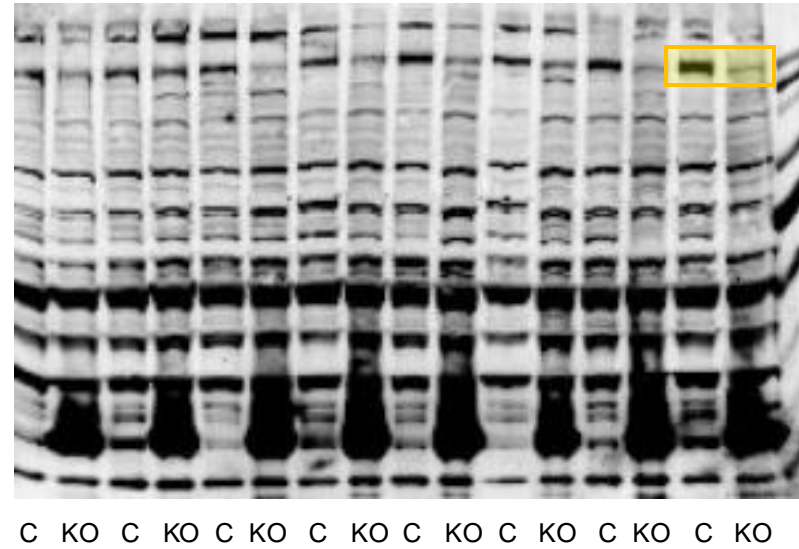

Actin

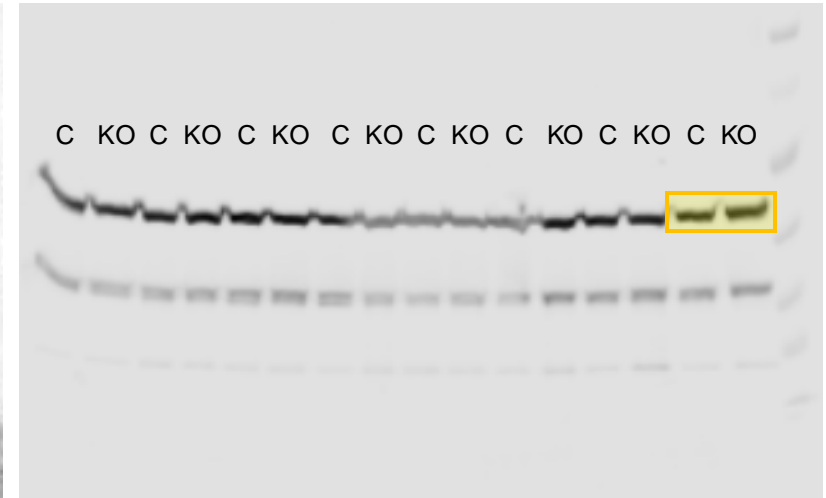

KO = *Depdc5* KO  
C = control

Full unedited gel for Figure 2B

pS6

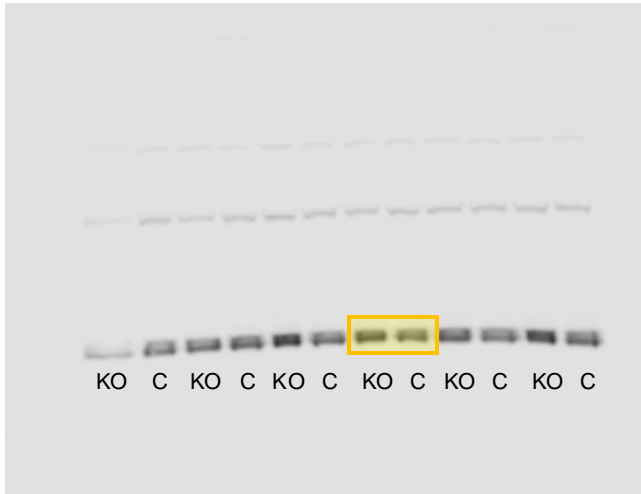

Total S6

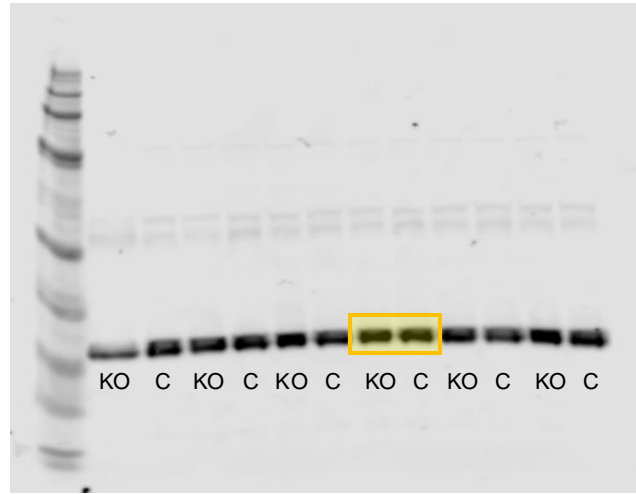

KO = *Depdc5* KO  
C = control

pAKT

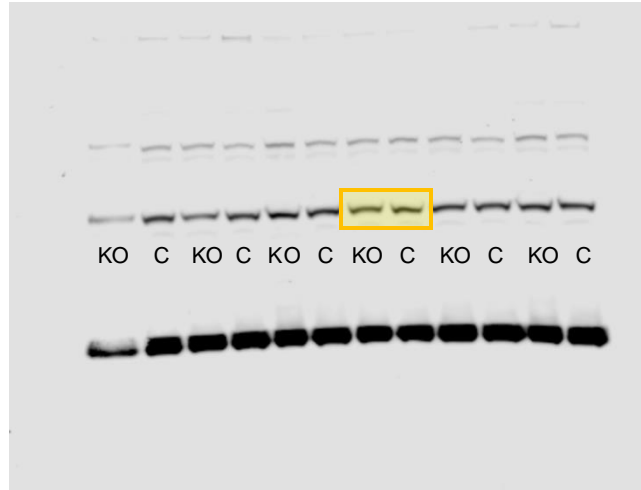

Total AKT

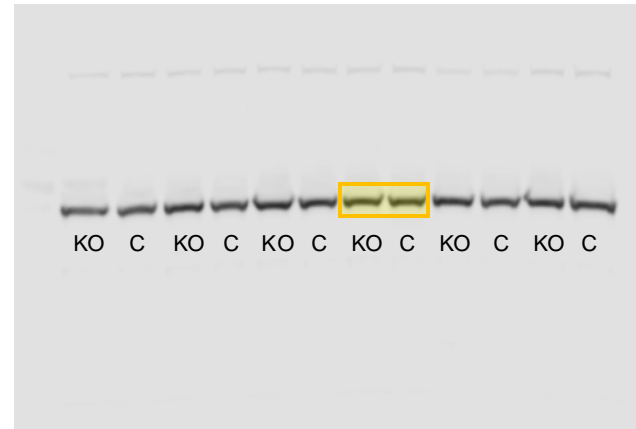

Full unedited gel for Figure 3A

pS6

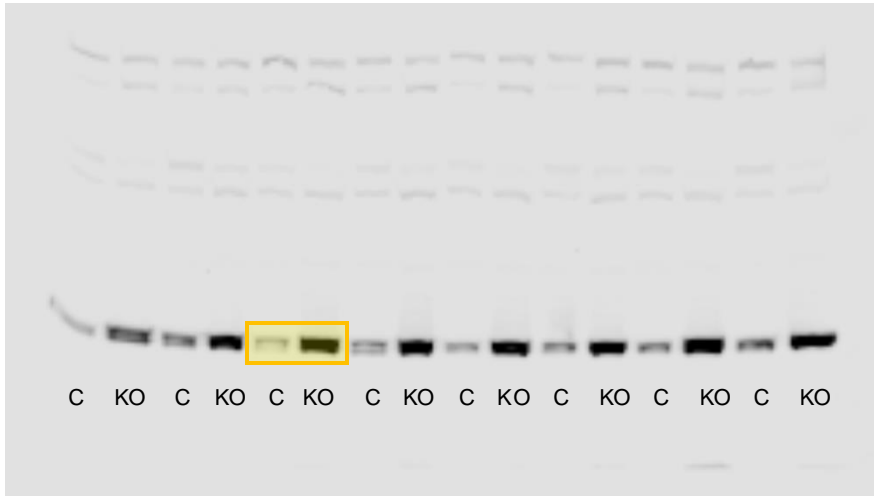

pAKT

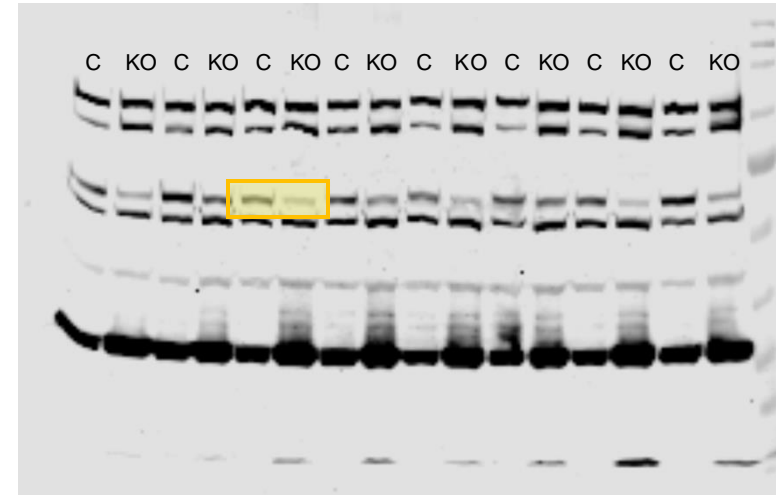

KO = *Depdc5* KO  
C = control

S6

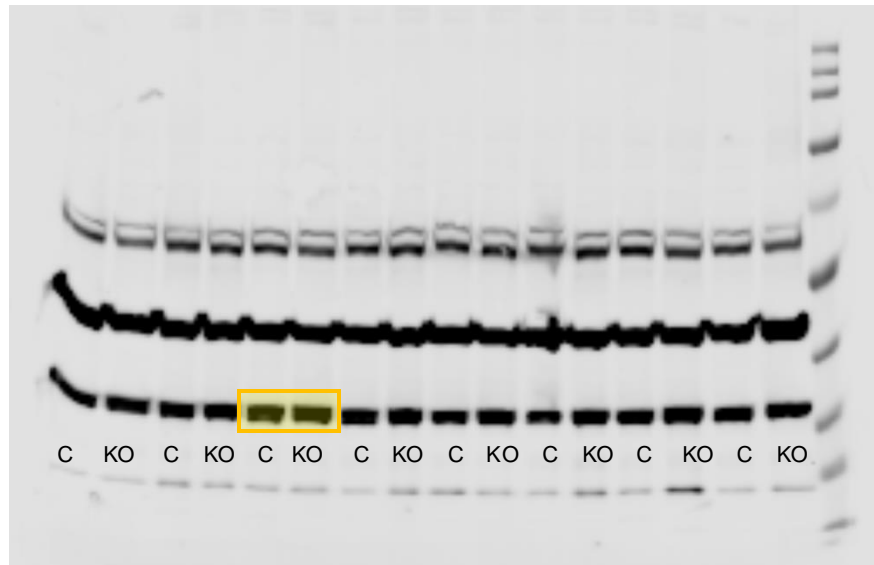

AKT

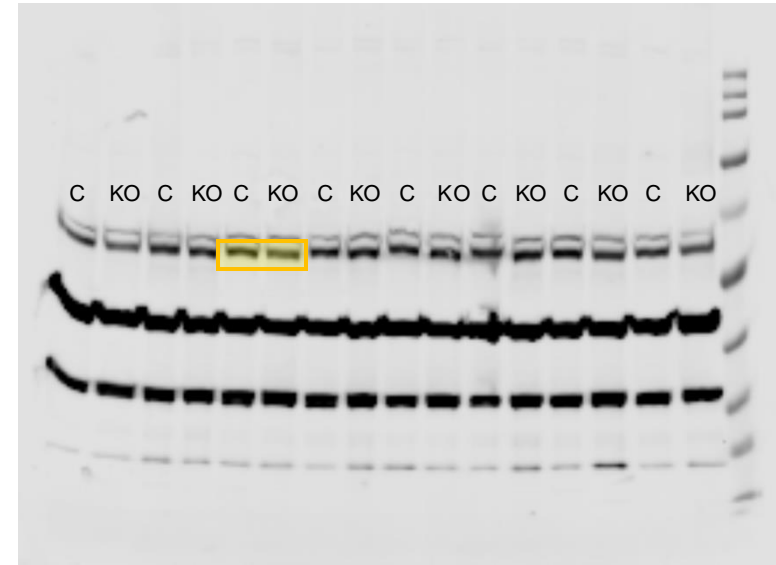

Full unedited gel for Figure 4A

GFP

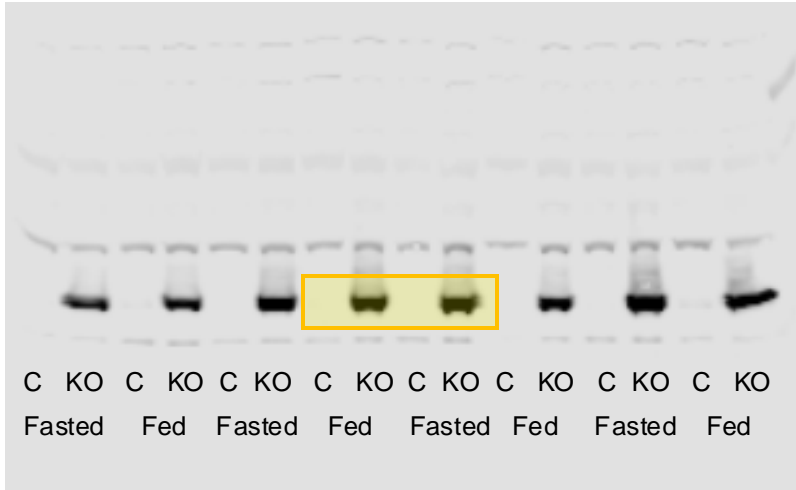

Depdc5

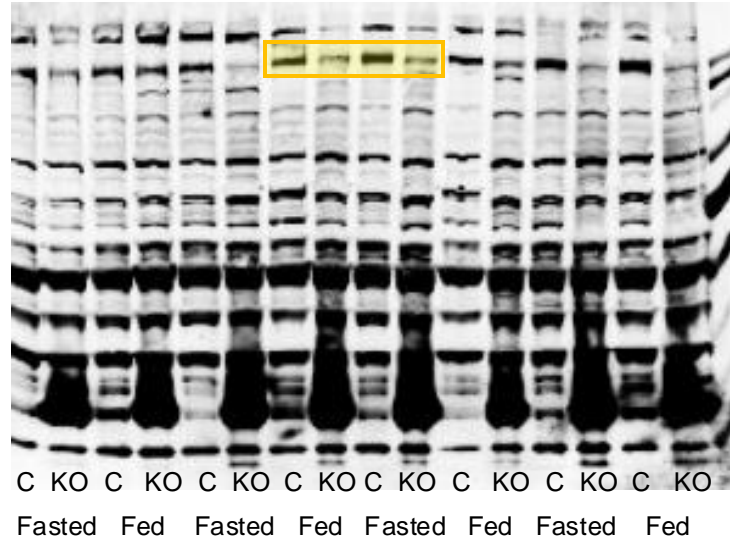

KO = *Depdc5* KO  
C = control

Actin

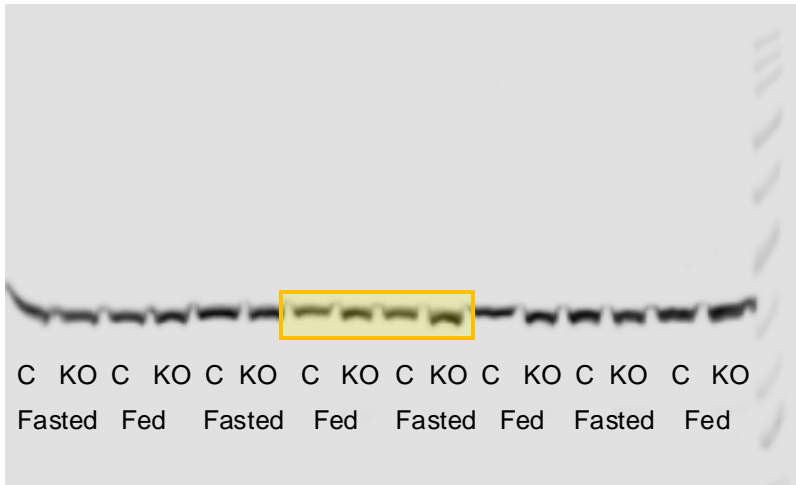

Full unedited gel for Figure 7D (1/2)

pS6

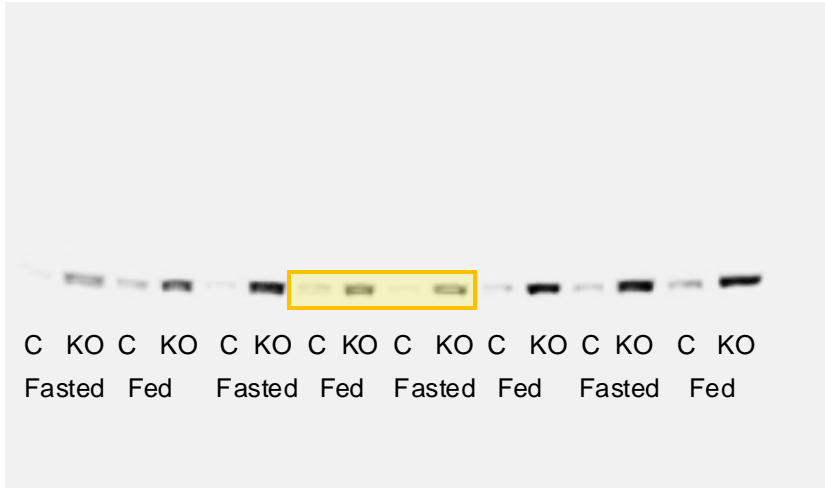

pAKT

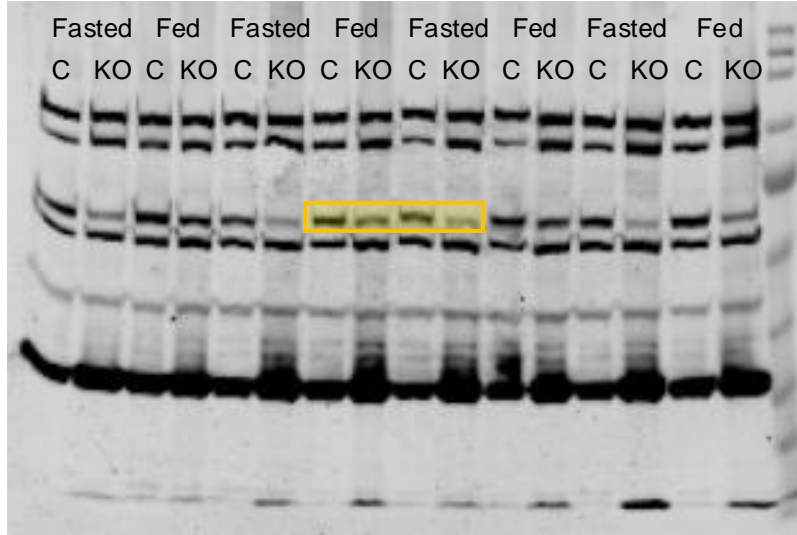

KO = *Depdc5* KO  
C = control

Total S6

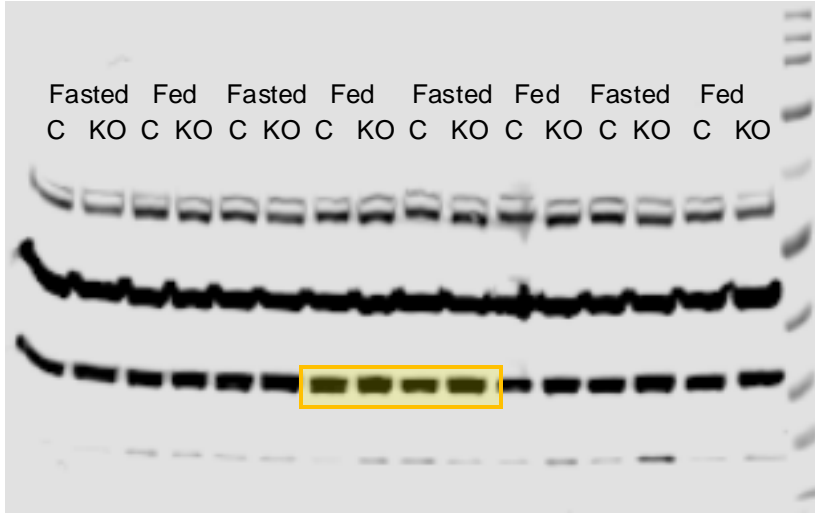

Total AKT

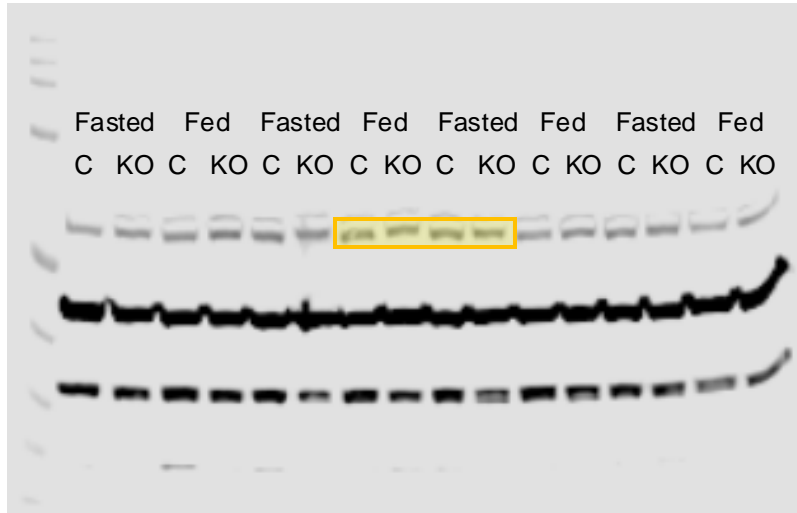

Full unedited gel for Figure 7D (2/2)

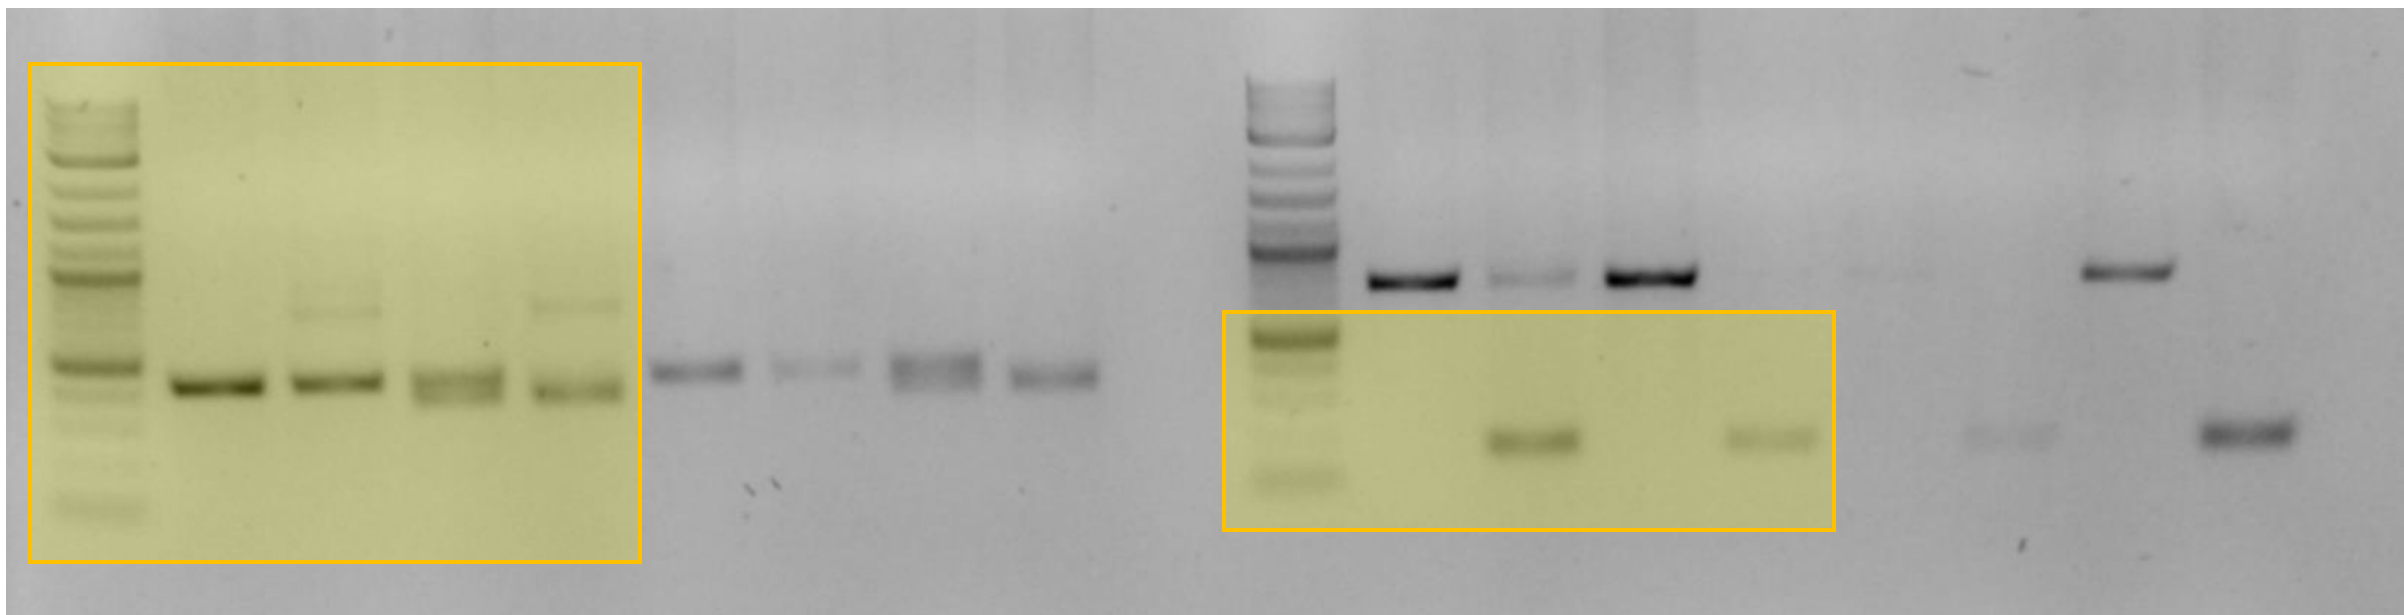

Full unedited gel for Supplemental Figure 4
